# Supplementary material for: Morpho butterfly-inspired optical diffraction, diffusion, and bio-chemical sensing
Source: Royal Society of Chemistry journal article supplement (doi:10.1039/c8ra04382e), 2018-01-01
Supplement: c8ra04382e1.pdf [file c8ra04382e1.pdf]

## Supplementary Information

### Morpho-Butterfly Inspired Optical Diffraction, Diffusion, and Bio-Chemicals Sensing

*Rajib Ahmed,<sup>1,2\*</sup> Xiaochao Ji,<sup>3</sup> Raghied M. H. Atta,<sup>4</sup> Ahmmed A. Rifat,<sup>5</sup> and Haider Butt<sup>1,\*</sup>*

<sup>1</sup> Nanotechnology Laboratory, School of Engineering, University of Birmingham,  
Birmingham B15 2TT, United Kingdom

<sup>2</sup> Bio-Acoustic MEMS in Medicine (BAMM) Laboratory, School of Medicine, Stanford  
University, Palo Alto, CA 94304, USA

<sup>3</sup> School of Metallurgy and Materials, University of Birmingham, Birmingham B15 2TT,  
United Kingdom

<sup>4</sup> Electrical Engineering Department, Engineering College, Taibah University, Madinah, Saudi  
Arabia

<sup>5</sup> Nonlinear Physics Centre, Research School of Physics and Engineering, The Australian  
National University, Acton, ACT-2601, Australia

\*Correspondence: a.rajib@osamember.org , h.butt@bham.ac.uk

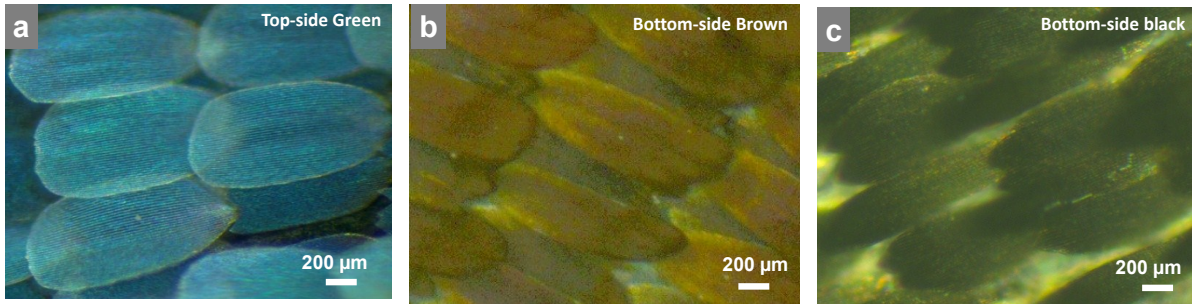

**Figure S1:** Magnified microscopic image of *Morpho*-butterfly wing scale. (a) Top-side green, (b,c) Bottom-side brown and black regions.

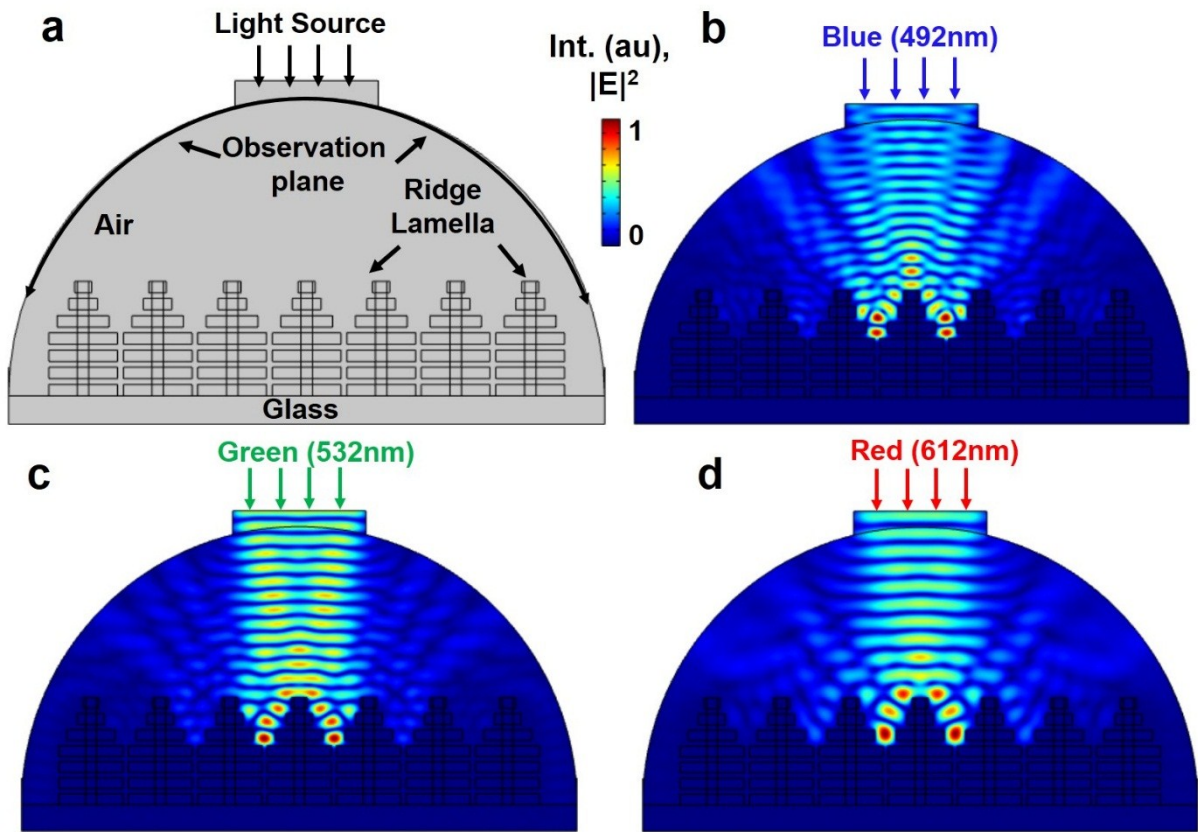

**Figure S2:** (a) Computational block diagram of normal reflection from ridge lamella structure. (b-d) Electric field's intensity distribution with violet, green, and red light normal illumination.

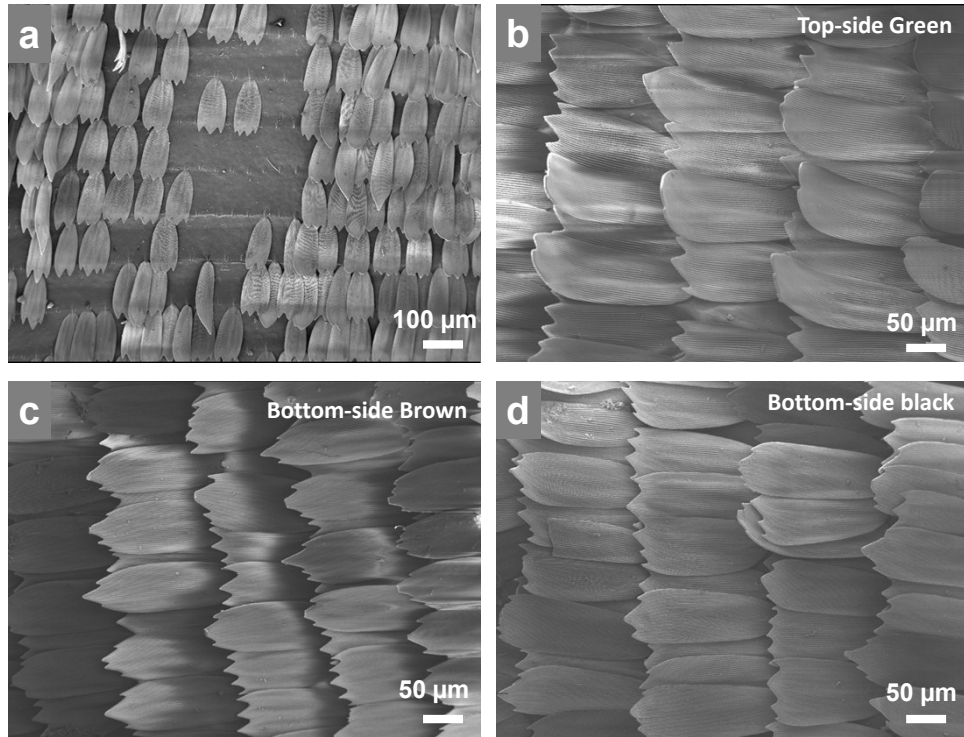

**Figure S3:** SEM image of *Morpho*-butterfly wing scale. (a) Layered structure, (b-d) Top-side green, (b,c) bottom-side brown and black regions.

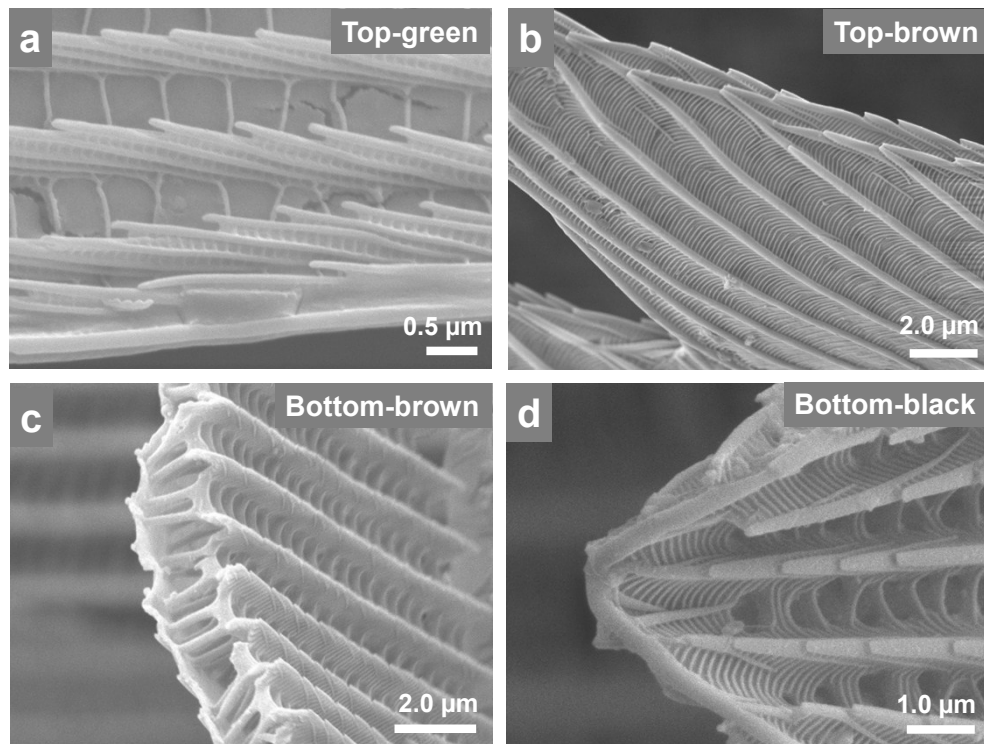

**Figure S4:** (a-d) Top and bottom side-view SEM image of *Morpho*-butterfly wing scale.
